# Supplementary material
Source: PubMed Central journal article supplement (PMC7611572)
Supplement: EMS126856-supplement-SI.pdf [file EMS126856-supplement-SI.pdf]

## Contents

|                                                                                                                                                                                                     |    |
|-----------------------------------------------------------------------------------------------------------------------------------------------------------------------------------------------------|----|
| <b>Supplementary Fig. 1</b>   Design, production, and use of the micro-well duct-on-chip technology. ...                                                                                            | 2  |
| <b>Supplementary Fig. 2</b>   Size and growth of hiPSC 3D aggregates grown in the micro-wells over 72 h. ....                                                                                       | 3  |
| <b>Supplementary Fig. 3</b>   Characterization of PDLOs (day 28) on the micro-well chip. ....                                                                                                       | 4  |
| <b>Supplementary Fig. 4</b>   Swelling of PDLOs upon stimulation with forskolin. ....                                                                                                               | 5  |
| <b>Supplementary Fig. 5</b>   Apical-outside polarity of PDLOs. ....                                                                                                                                | 6  |
| <b>Supplementary Fig. 6</b>   Influence of the well diameter and seeded cell number per well on ductal differentiation determined by scRNA-seq. ....                                                | 7  |
| <b>Supplementary Fig. 7</b>   Ductal subcluster-specific genes located within PLDOs and primary pancreas tissue on the protein level. ....                                                          | 8  |
| <b>Supplementary Fig. 8</b>   Single-cell transcript analysis of genes associated with extracellular matrix (ECM) showing dynamical expression during the differentiation trajectory of PDLOs. .... | 9  |
| <b>Supplementary Fig. 9</b>   Pathway enrichments within the ductal transcriptional differentiation kinetics. ....                                                                                  | 10 |
| <b>Supplementary Fig. 10</b>   CFTR <sup>+</sup> and mucin-rich duct-like cell type markers map cell populations derived from primary human pancreas <sup>26</sup> . ....                           | 11 |
| <b>Supplementary Fig. 11</b>   Co-culturing of PDLOs and human pancreatic stellate cell (HPaSteC) aggregates on a micro-well chip. ....                                                             | 12 |
| <b>Supplementary Fig. 12</b>   FLNB expression in PDLOs and PDAC and overall survival curve of FLNB. ....                                                                                           | 13 |

### As separate files:

|                                                                                                                                                                                                         |  |
|---------------------------------------------------------------------------------------------------------------------------------------------------------------------------------------------------------|--|
| <b>Supplementary Data 1</b>   Top 300 DEGs of the scRNA-seq PDLO differentiation kinetic clusters (Fig. 4c) calculated with the t-test method. ....                                                     |  |
| <b>Supplementary Data 2</b>   Dynamical genes plotted in Fig. 6f calculated within the dynamic velocity model. ....                                                                                     |  |
| <b>Supplementary Data 3</b>   Top 300 DEGs of the Louvain clusters (Fig. 7a) from integrated primary scRNA-seq datasets calculated with the t-test method. ....                                         |  |
| <b>Supplementary Data 4</b>   Proteins identified by LC-MS/MS in the PDLO secretome, and proteome. Further, the file contains the proteomes of individual and co-culture PDLOs and stellate cells. .... |  |
| <b>Supplementary Data 5</b>   Results of the ELISA FLNB screening of PDAC and healthy control patient serum (Fig. 8h). ....                                                                             |  |
| <b>Supplementary Data 6</b>   Used Antibodies for IHC/IF-p, ICC/IF, and FC staining. ....                                                                                                               |  |
| <b>Supplementary Movie 1</b>   Live cell imaging during micro-well chip PDLO differentiation from day 24 until day 31 of four PDLOs. ....                                                               |  |

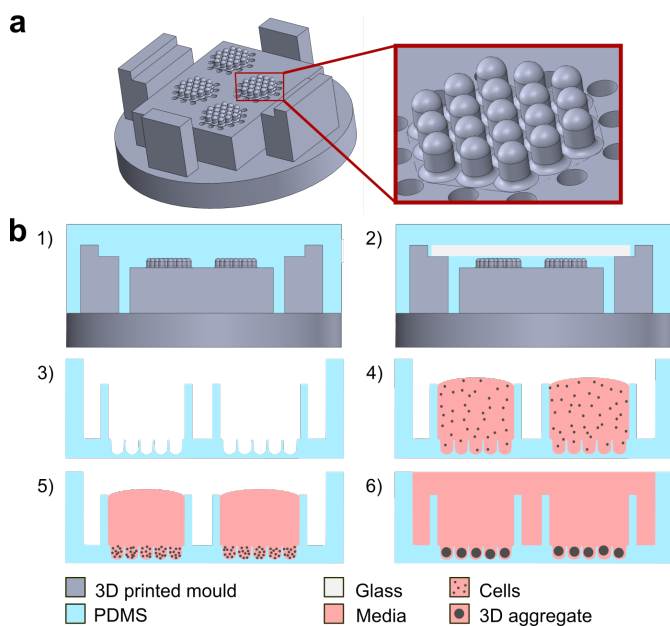

**Supplementary Fig. 1 | Design, production, and use of the micro-well duct-on-chip technology.** **a**, 3D printed micro-well chip mould of a  $600\ \mu\text{m}$  well diameter. **b**, Schematic of the micro-well chip fabrication (steps 1–3) and cell seeding process (steps 4–6). Step 1: PDMS is poured into the 3D printed mould. Step 2: A glass slide is aligned to imprint spacers of the mould. Step 3: PDMS is released from the mould and glass. Step 4: After passivation of PDMS with the hydrophobic co-block polymer pluronic-F127, cells resuspended in  $20\text{--}40\ \mu\text{L}$  of media are pipetted into the micro-well arrays held by surface tension due to the 12 surrounding pillars. Step 5: Cells settle into the micro-wells within 30 min. Step 6: The micro-well chip is filled up to  $800\ \mu\text{L}$  of media and cells aggregate within 4 h.

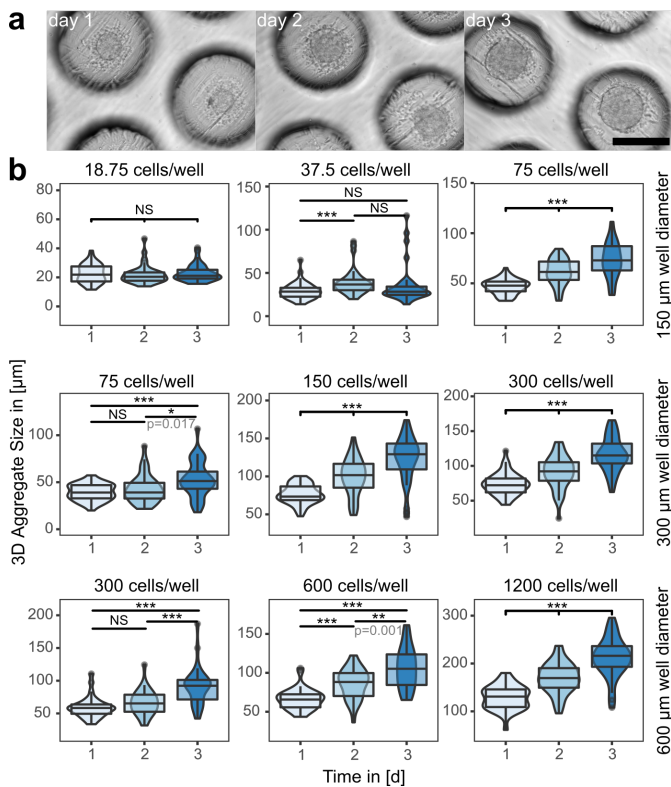

**Supplementary Fig. 2 | Size and growth of hiPSC 3D aggregates grown in the micro-wells over 72 h. a,** Representative bright-field images of 3D hiPSC aggregates from initial 150 cells per well 24, 48, and 72 hours after seeding on the micro-well chip. Scale bar is 200  $\mu\text{m}$ . **b,** Size distribution of hiPSC derived 3D aggregates 24, 48, and 72 h after seeding in wells with a diameter of 150, 300, and 600  $\mu\text{m}$  (from top to bottom). The number of cells seeded per well was systematically varied to optimize the growth and viability of the 3D aggregates. Per condition, 52 3D aggregates were measured from three different micro-well arrays. Boxplots display the median with the first and third quartile, whiskers denote the 1.5x interquartile range and outliers are marked as dots. Significance levels are indicated as follows: \*: p-value<0.05; \*\*: p-value< 0.01; \*\*\*: p-value<0.001 and calculated with a two-sample Welch test.



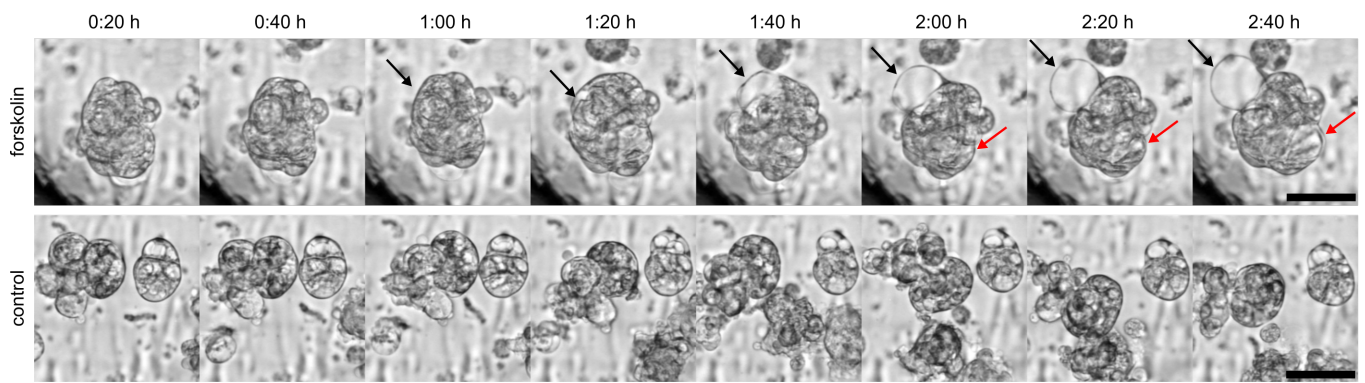

**Supplementary Fig. 4 | Swelling of PDLOs upon stimulation with forskolin.** Live imaging over the first 2 h and 40 min of stimulation with 20  $\mu\text{M}$  forskolin and 100  $\mu\text{M}$  IBMX; and control with  $\text{H}_2\text{O}$ . Scale bar denotes 50  $\mu\text{m}$ .

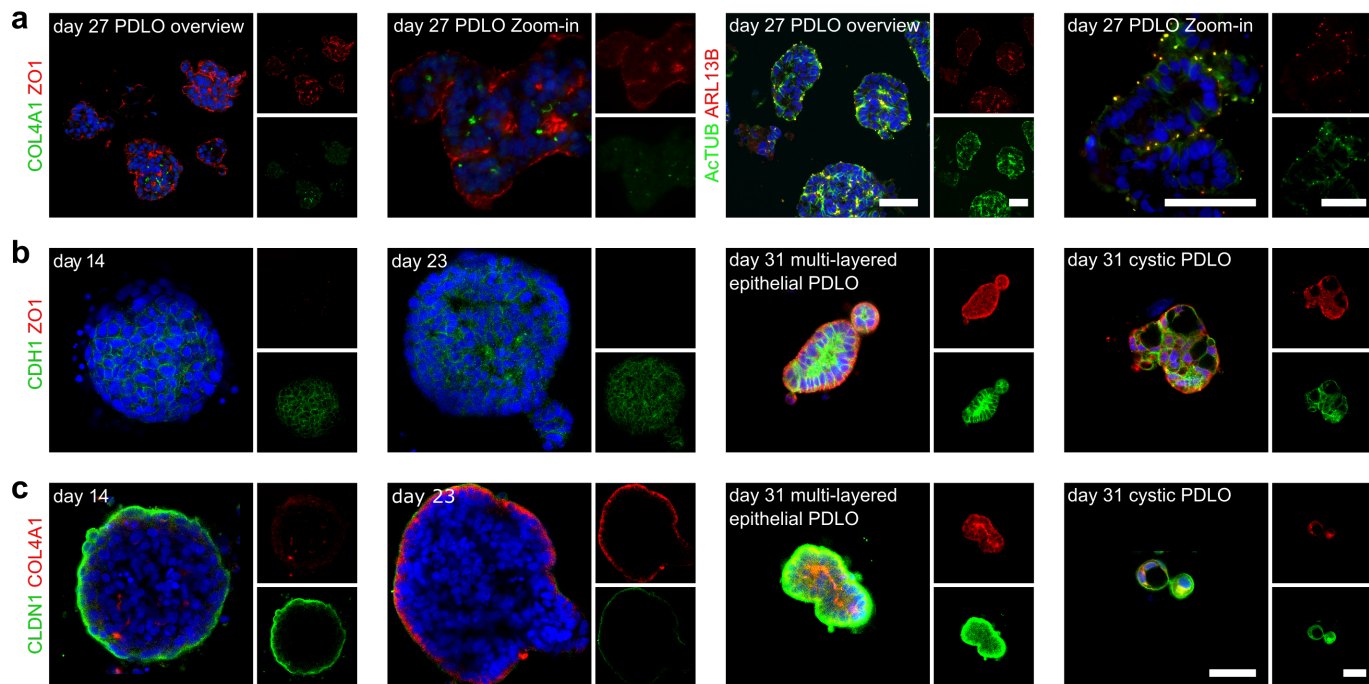

**Supplementary Fig. 5 | Apical-outside polarity of PDLOs.** **a**, Overview and magnification of apical-basal polarity images of PPs and PDLOs shown in Fig. 3d. **b** and **c**, Fluorescence images of polarity markers ZO1, CDH1 and COL4A1, CLDN1 over the time course of ductal differentiation.

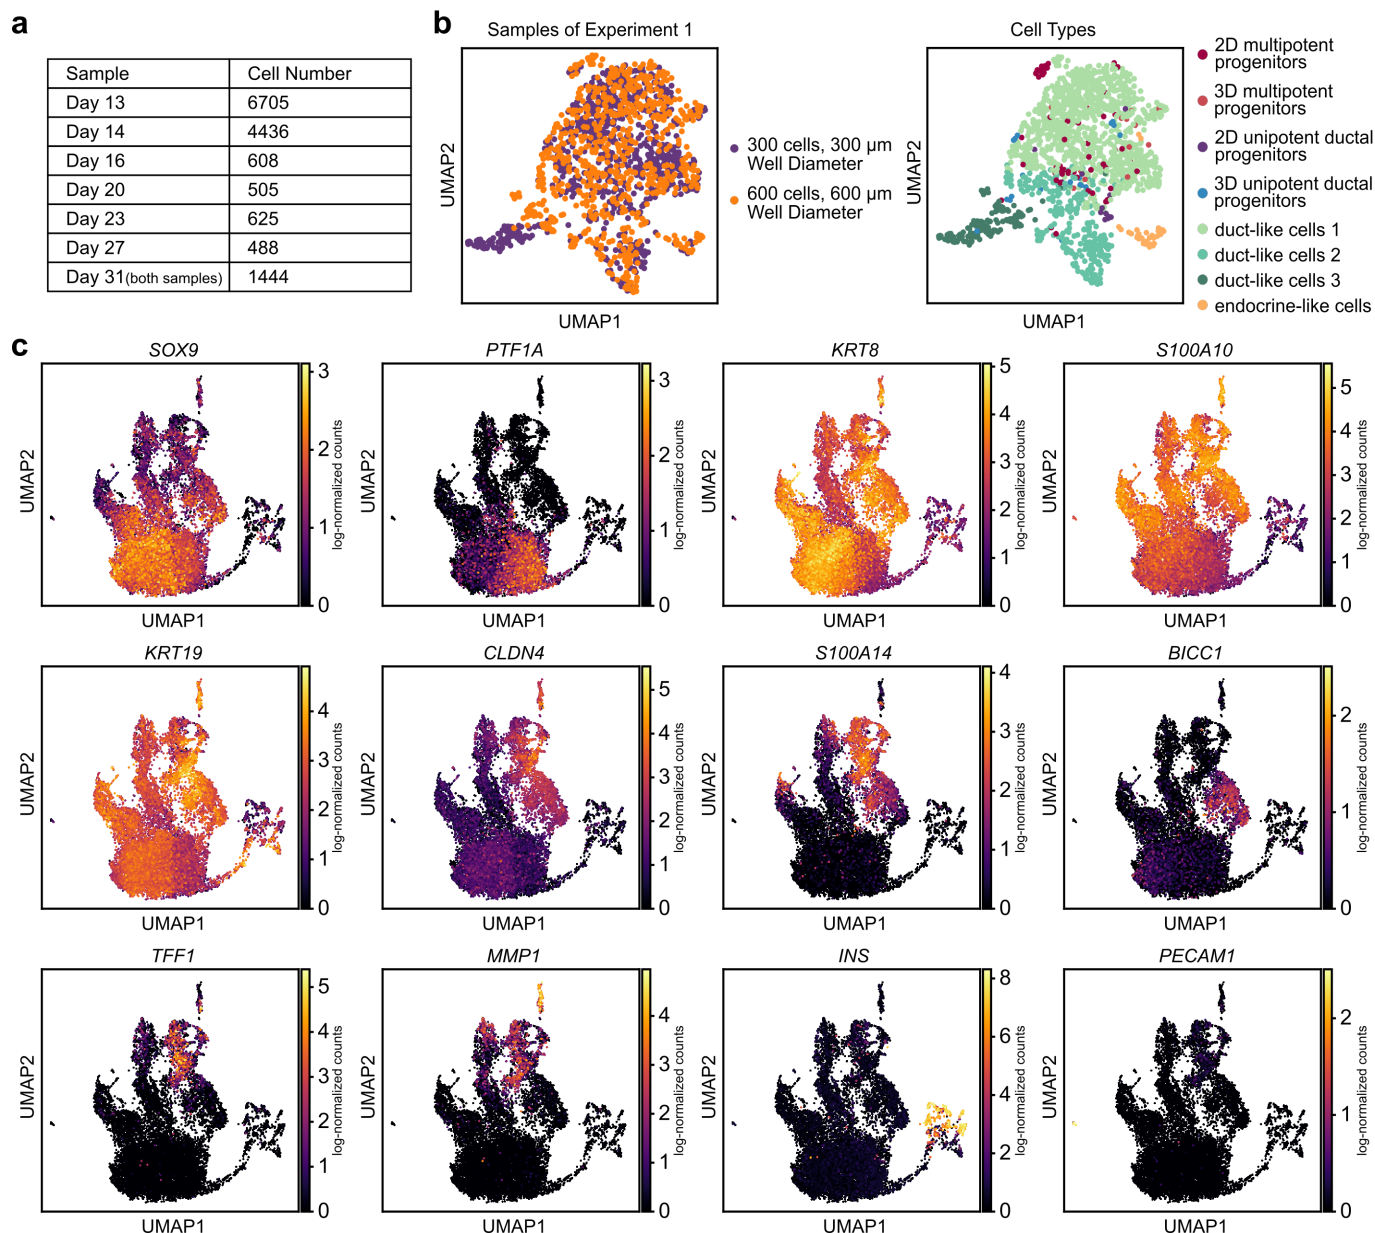

**Supplementary Fig. 6 | Influence of the well diameter and seeded cell number per well on ductal differentiation determined by scRNA-seq. a**, Single-cell count statistics for the cells presented in Fig. 3. **b**, UMAP cluster plot of single-cell transcriptomes acquired from PDLOs after 31 DOD. While in one condition, 3D aggregates were initiated with 300 cells per well in wells with a diameter of 300  $\mu\text{m}$ , in the other condition, 3D aggregates were formed by 600 cells in a 600  $\mu\text{m}$  well. In the second UMAP plot cell types from experiment 1 are assigned according to Fig. 3c. **c**, UMAP plots of the single-cell transcriptomes highlighting the cluster-specific expression of differentially regulated pancreatic progenitor and ductal markers. Complementary to Fig. 4e.

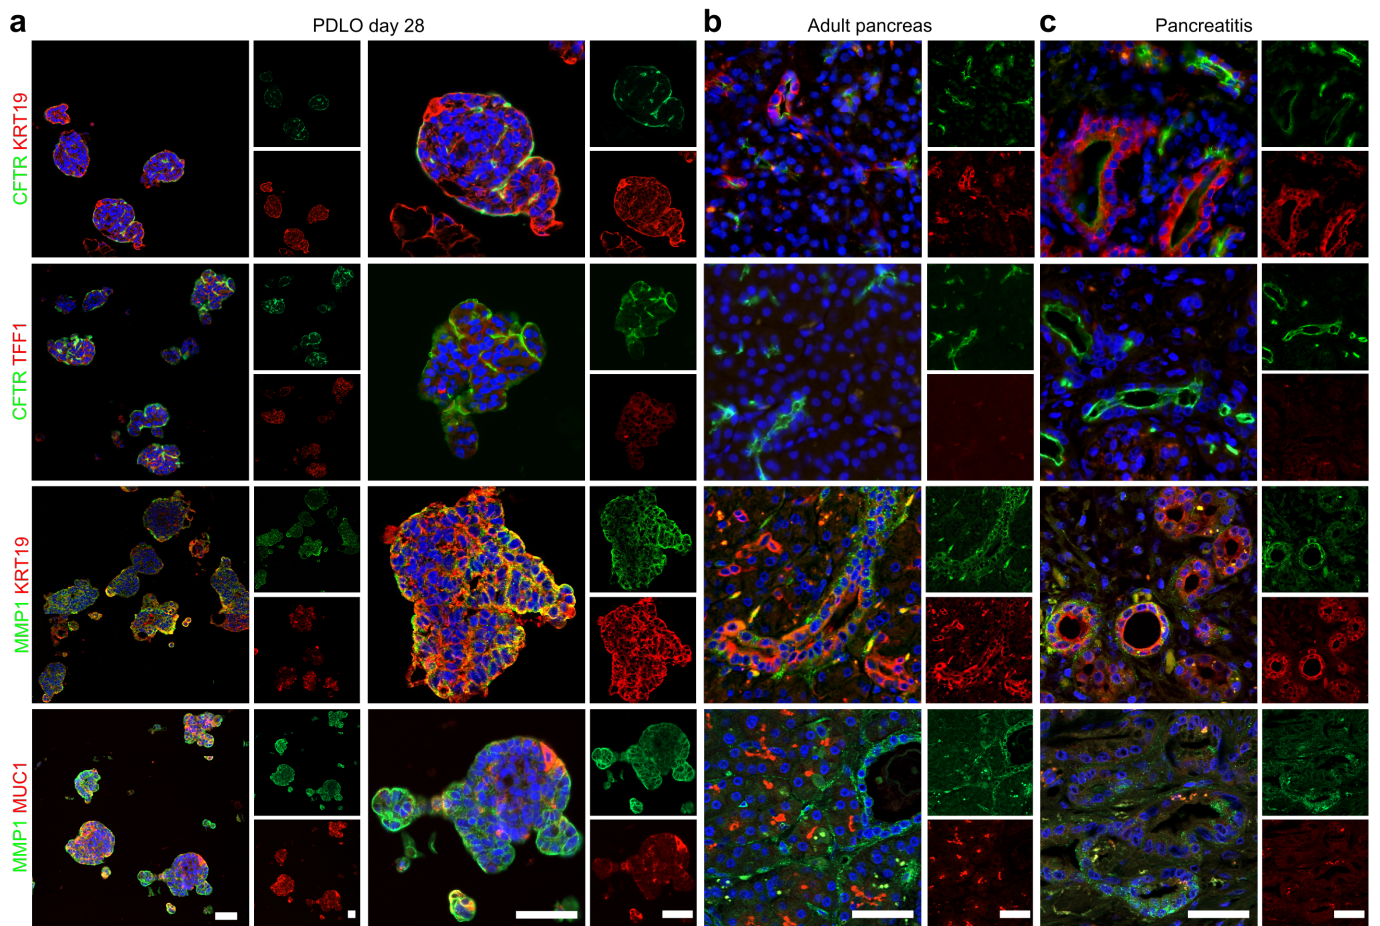

**Supplementary Fig. 7 | Ductal subcluster-specific genes located within PLDOs and primary pancreas tissue on the protein level. a,** PDLOs differentiated until day 28 stained for cell subtype markers and pancreatic marker KRT19. **b,c,** The same markers are used to locate the *in vitro* generated ductal-like cell subtypes in healthy human primary pancreas tissue and tissue from pancreatitis patient, respectively. Images are complementary to Fig. 5. Scale bar denotes 50  $\mu$ m.



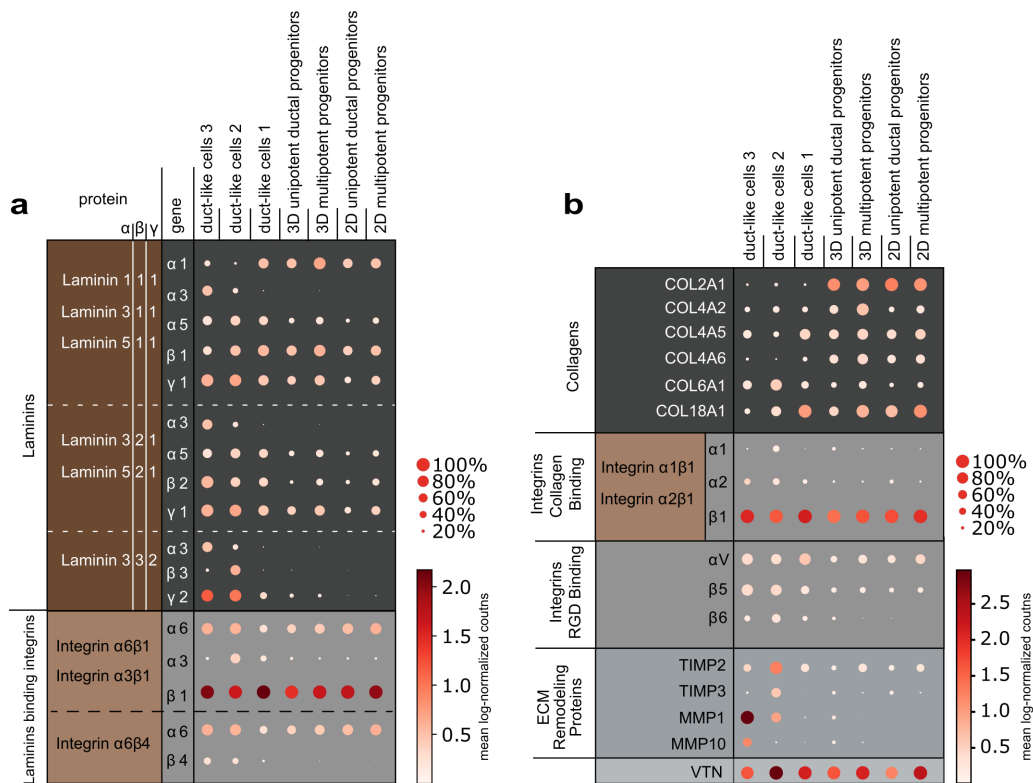

**Supplementary Fig. 8 | Single-cell transcript analysis of genes associated with extracellular matrix (ECM) showing dynamical expression during the differentiation trajectory of PDLOs.** Dynamical genes were determined by the velocity analysis in main Fig. 5. **a**, Dot plot shows the change of laminin and laminin-binding integrin gene expression within the cells of the different clusters. **b**, Dot plot shows the change of collagen, collagen-binding integrins, RGD binding integrins, and ECM remodelling gene expression within the cells of the different cluster during differentiation.

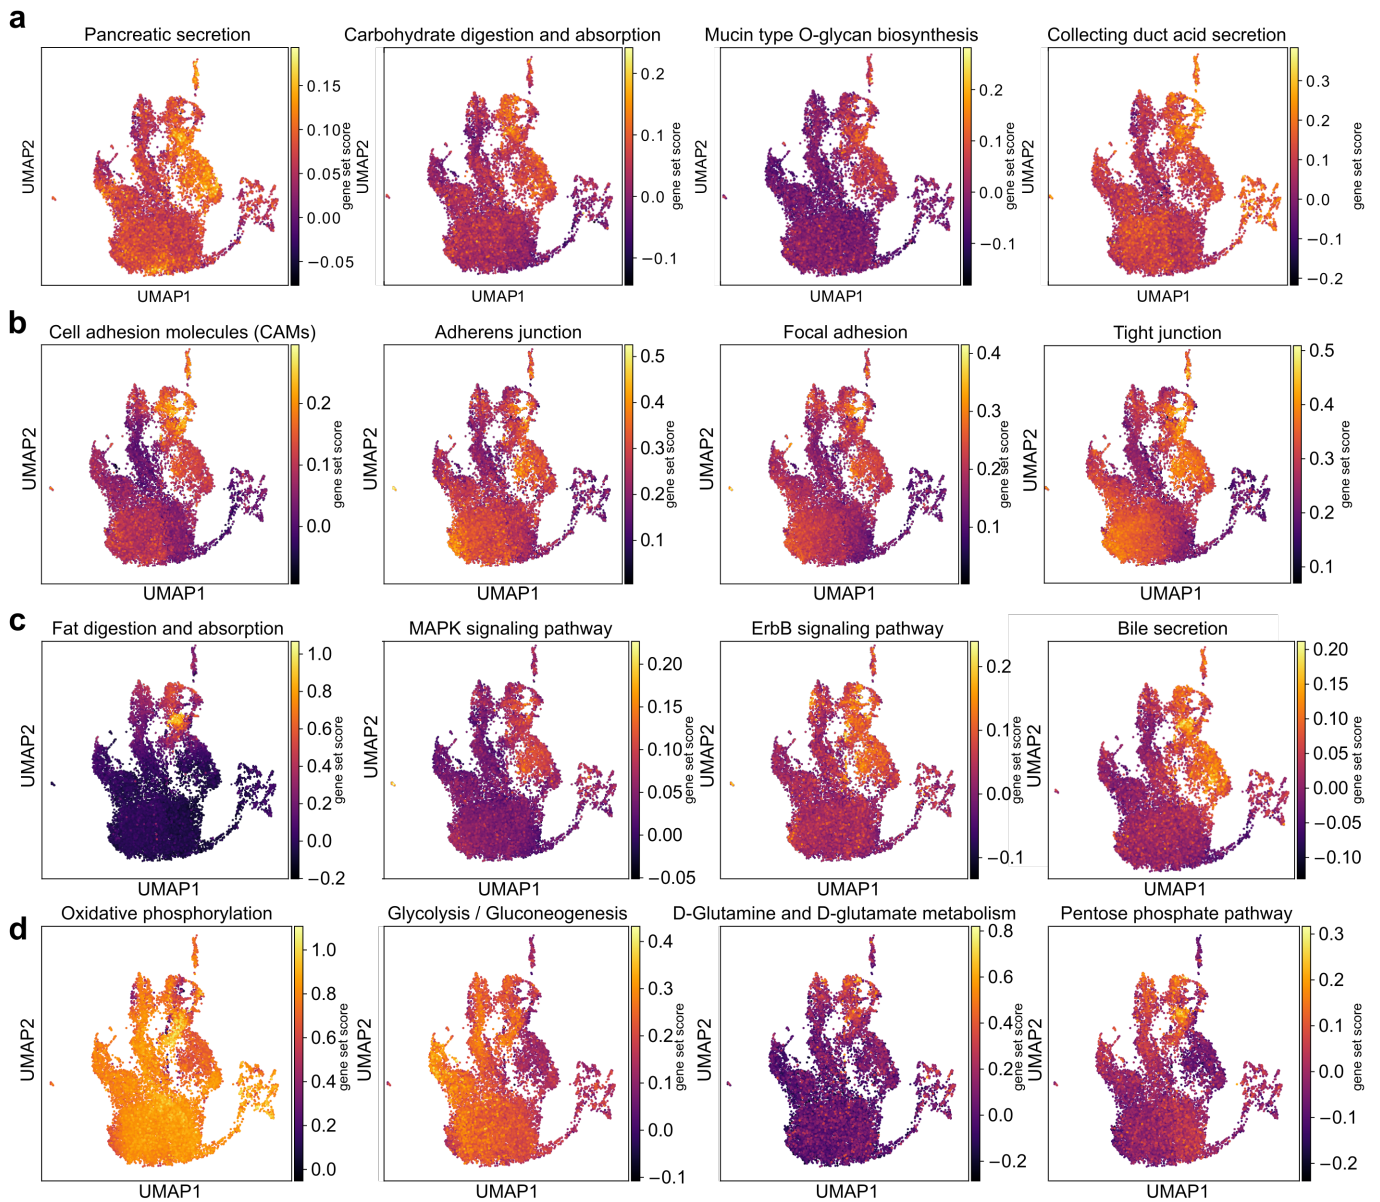

**Supplementary Fig. 9 | Pathway enrichments within the ductal transcriptional differentiation kinetics with focus on a, ductal function, b, epithelial cell organization, c, pancreas function and signalling, and d, metabolic energy conversion.**

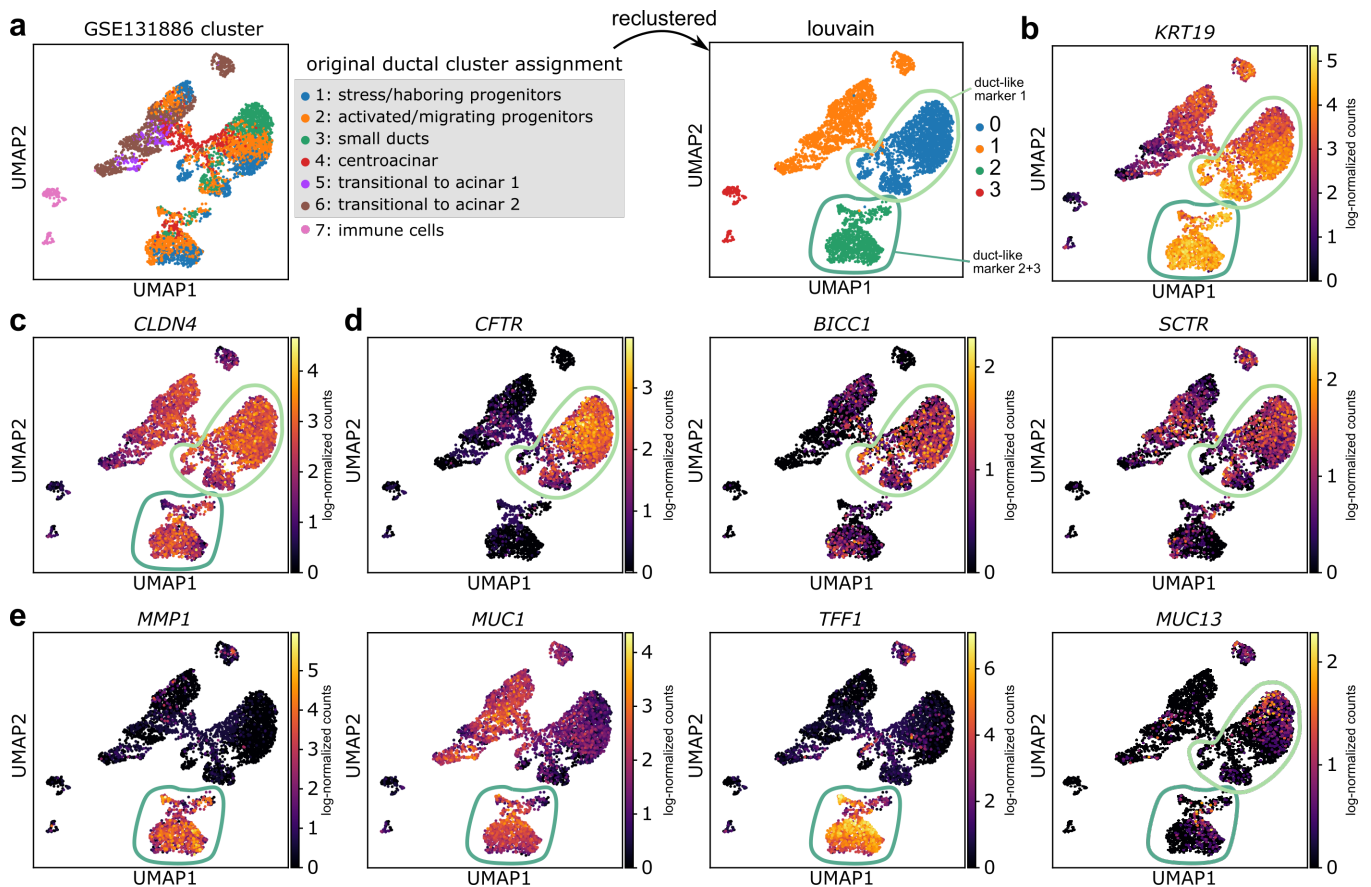

**Supplementary Fig. 10 | CFTR<sup>+</sup> and mucin-rich duct-like cell type markers map cell populations derived from primary human pancreas<sup>26</sup>.** **a**, Reanalysis of primary human ductal scRNA-seq data<sup>26</sup>. **b** and **c**, *KRT19* and *CLDN4* marker mapped on the cell data set. **d**, Expression patterns of ductal-like marker genes for the three subpopulations derived from PDLOs. *CFTR/BICC1/SCTR* and *MMP1/MUC1/TFF1* positive cells (colour coded circles) separate in the data set, whereas *MUC13* shows an overlap between the ductal cell clusters in the primary data.

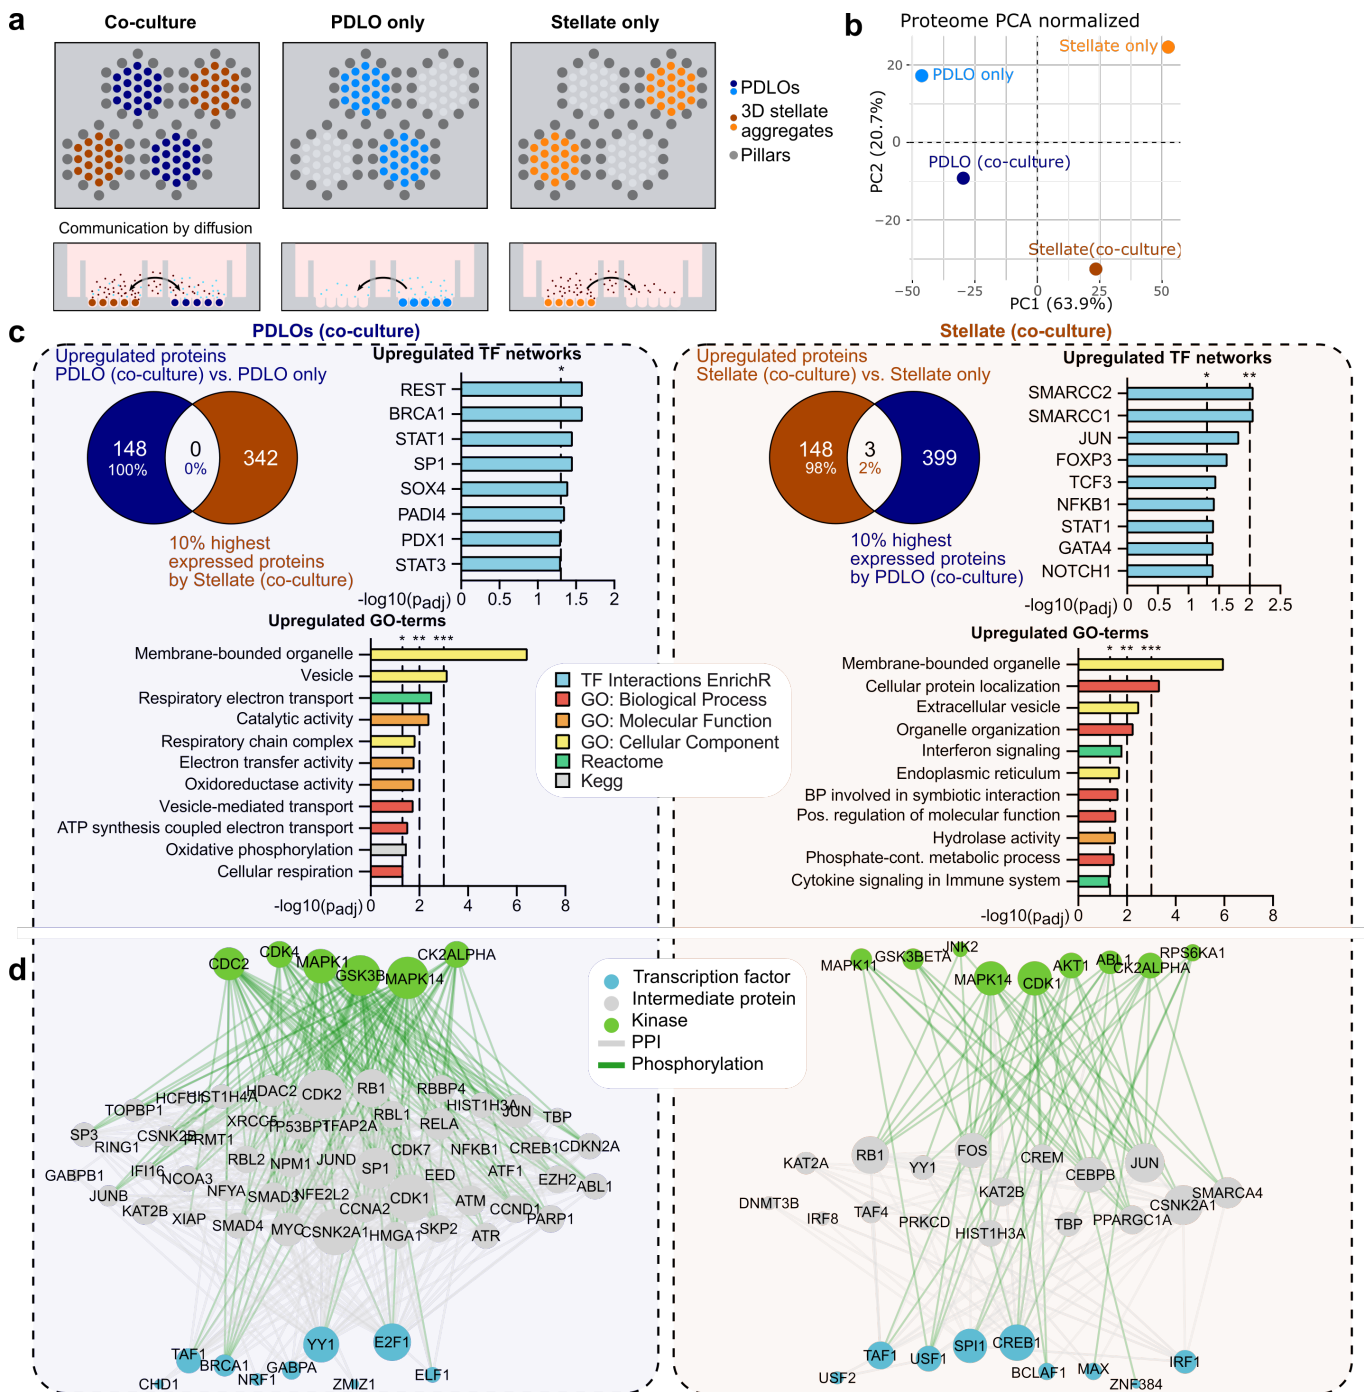

**Supplementary Fig. 11 | Co-culturing of PDLOs and human pancreatic stellate cell (HPaSteC) aggregates on a micro-well chip.** **a**, Micro-well chip experiment for co-culturing PDLOs and 3D HPaSteC aggregates. The four fluidically separable hexagonal arrays on the micro-well chip enabled co-cultures of PDLOs and HPaSteCs without mixing cell types. After 3 days of co-culture, the proteomes of both cell types were determined by label-free mass spectrometry. **b**, Principal component analysis (PCA) separating co-culture of PDLOs and HPaSteCs from their individual cultures ( $n=1$ ). **c**, Cross-contamination test and GO term analysis of the upregulated protein sets in PDLOs and HPaSteCs. Protein interactions with several transcription factors such as STAT1, STAT3 or JUN, STAT1, NFKB were enriched and GO terms indicated an increased autocrine and paracrine signalling (membrane-bounded organelle, extracellular vesicle, vesicle-mediated transport) and energy consumption (respiratory electron transport, respiratory chain complex, ATP synthesis, or oxidative phosphorylation). Significance levels are indicated as follows: \*:  $p$ -value $<0.05$ ; \*\*:  $p$ -value $<0.01$ ; \*\*\*:  $p$ -value $<0.001$ . **d**, Protein network analysis<sup>93</sup> of the upregulated protein sets in co-cultured PDLOs and HPaSteCs suggested reciprocal signalling. In both cell types, we found mitogenic signalling, enabled by the diffusion-driven communication of the co-cultured cells.

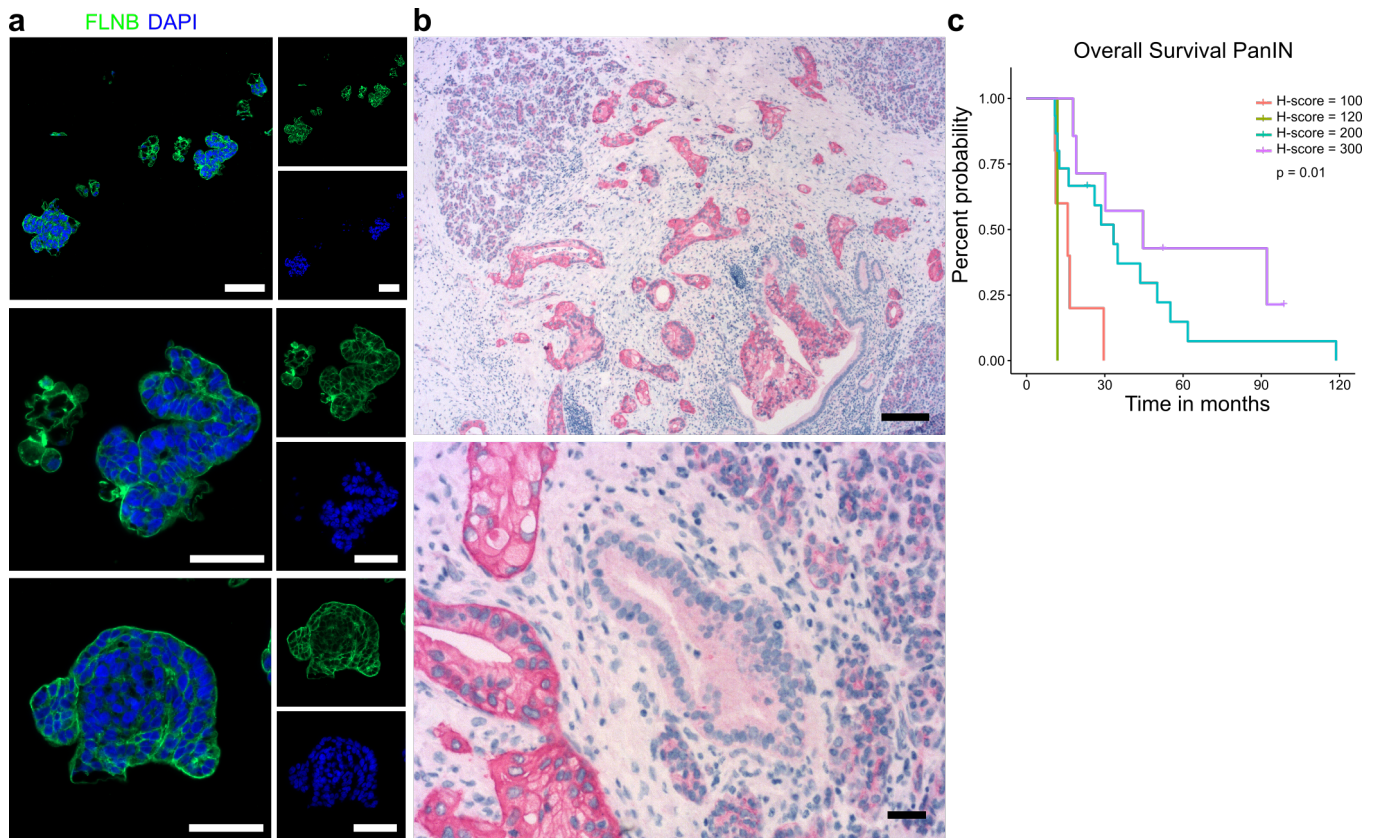

**Supplementary Fig. 12 | FLNB expression in PDLOs and PDAC and overall survival curve of FLNB. a,** Fluorescence images of PDLOs stained for FLNB. Scale bar denotes 100  $\mu\text{m}$  (overview) and 50  $\mu\text{m}$  (magnifications). **b,** Different image magnifications of FLNB IHC staining of PDAC tissue related to Fig. 8e. Scale bars denote 100  $\mu\text{m}$  (overview) and 20  $\mu\text{m}$  (magnification). **c,** Computationally generated Kaplan Meyer plot for FLNB. P-value was calculated with the log-rank test.
